# Supplementary material for: Noncovalently bound excited-state dimers: a perspective on current time-dependent density functional theory approaches applied to aromatic excimer models
Source: Royal Society of Chemistry journal article supplement (doi:10.1039/d3ra07381e), 2023-01-01
Supplement: d3ra07381e1.pdf [file d3ra07381e1.pdf]

**Supporting Information:**

**Noncovalently bound excited-state dimers: a  
perspective on current time-dependent Density  
Functional Theory approaches applied to  
aromatic excimer models**

Amy C. Hancock and Lars Goerigk\*

*School of Chemistry, The University of Melbourne, Victoria 3010, Australia;*

*Ph: +61-(0)3-83446784*

E-mail: [lars.goerigk@unimelb.edu.au](mailto:lars.goerigk@unimelb.edu.au)

# Contents

|                                                                                                                 |             |
|-----------------------------------------------------------------------------------------------------------------|-------------|
| <b>SI.1 Explicit definition of coordinates defining inter-monomer distance</b>                                  | <b>S-3</b>  |
| <b>SI.2 Additional Data for Establishing Suitable Wavefunction Reference Method</b>                             | <b>S-3</b>  |
| SI.2.1 Numerical Data for Wavefunction Methods . . . . .                                                        | S-3         |
| SI.2.2 SCS-CC2 Dissociation Curves Comparing Basis Sets and Extrapolation to Complete Basis Set Limit . . . . . | S-4         |
| <b>SI.3 The <math>\omega</math>B97X Problem</b>                                                                 | <b>S-6</b>  |
| <b>SI.4 Additional Data For Benchmarking TD-DFT methods</b>                                                     | <b>S-7</b>  |
| SI.4.1 Fock Exchange Study . . . . .                                                                            | S-7         |
| SI.4.1.1 Tables of Minima and Signed Percentage Errors . . . . .                                                | S-7         |
| SI.4.1.2 Dissociation Curves . . . . .                                                                          | S-8         |
| SI.4.2 DFT-D Corrected TD-DFT . . . . .                                                                         | S-10        |
| SI.4.2.1 Dissociation Curves . . . . .                                                                          | S-10        |
| SI.4.2.2 Unphysical Positive Regions in Mid-range of Dissociation Curves . . . . .                              | S-12        |
| SI.4.3 Numerical Data For Binding Minima and Associated Percentage errors . . . . .                             | S-15        |
| SI.4.4 Mean Absolute Deviations . . . . .                                                                       | S-17        |
| <b>References</b>                                                                                               | <b>S-18</b> |

## SI.1 Explicit definition of coordinates defining inter-monomer distance

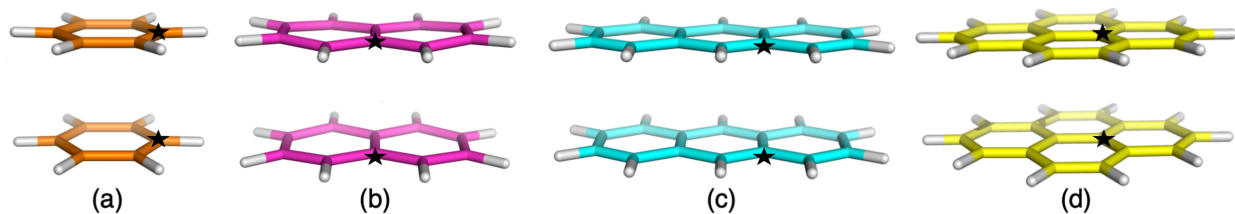

**Figure S1:** Diagrams of excimer model structures illustrating the atom coordinates used to define the inter-monomer distance for dissociation energy curves. Z-matrix templates used for defining the inter-monomer distance from these coordinates is given in the other supplementary files. Refer to README file for usage.

## SI.2 Additional Data for Establishing Suitable Wavefunction Reference Method

### SI.2.1 Numerical Data for Wavefunction Methods

**Table S1:** Explicit minima of SCS-CC2 and CC2 interaction energy curves of the lowest singlet excited state of the stacked benzene dimer for the basis set study. The distance of the minimum is denoted  $r_e$  (Å) and the associated interaction energy at that position  $\Delta E$  (kcal/mol).

| Basis set   | SCS-CC2 |            | CC2   |            |
|-------------|---------|------------|-------|------------|
|             | $r_e$   | $\Delta E$ | $r_e$ | $\Delta E$ |
| def2-SVP    | 2.99    | -12.60     | 2.90  | -18.22     |
| def2-TZVP   | 2.99    | -13.18     | 2.90  | -20.19     |
| def2-QZVP   | 2.99    | -13.29     | 2.90  | -20.64     |
| cc-pVTZ     | 3.00    | -12.99     | 2.90  | -19.95     |
| def2-TZVPD  | 3.00    | -15.61     | 2.90  | -22.75     |
| aug-cc-pVTZ | 3.00    | -15.03     | 2.90  | -22.37     |

**Table S2:** CCSDR(3) and SCS-CC2 interaction energies (kcal/mol) of the lowest singlet excited state of the stacked benzene dimer relative to the excited state asymptote (value at 16 Å) for Karlsruhe basis sets and CBS limit extrapolations.

| Distance (Å) | CCSDR(3) |           |          | SCS-CC2  |          |
|--------------|----------|-----------|----------|----------|----------|
|              | def2-SVP | def2-TZVP | CBS(2,3) | CBS(2,3) | CBS(3,4) |
| 2.90         | -10.72   | -11.31    | -13.06   | -14.56   | -13.40   |
| 2.95         | -11.19   | -11.76    | -13.41   | -14.76   | -13.63   |
| 3.00         | -11.39   | -11.96    | -13.52   | -14.73   | -13.62   |
| 3.05         | -11.36   | -11.96    | -13.42   | -14.52   | -13.42   |

## SI.2.2 SCS-CC2 Dissociation Curves Comparing Basis Sets and Extrapolation to Complete Basis Set Limit

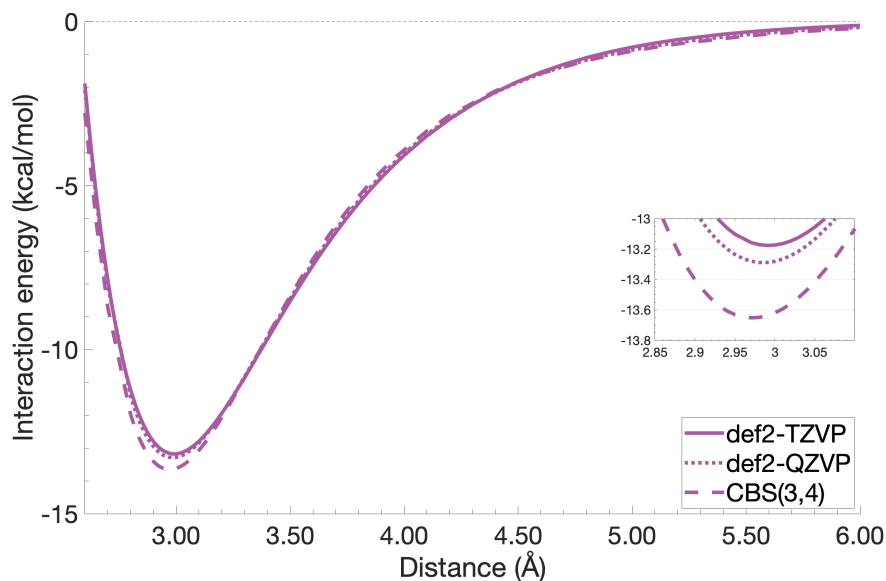

**Figure S2:** Dissociation curves for the lowest-lying excited state of the benzene excimer with SCS-CC2 across two successive basis sets in the Karlsruhe family (def2-nZVP) and their complete basis set extrapolated result, CBS(3,4). A magnified snapshot of the minima is shown to the right.

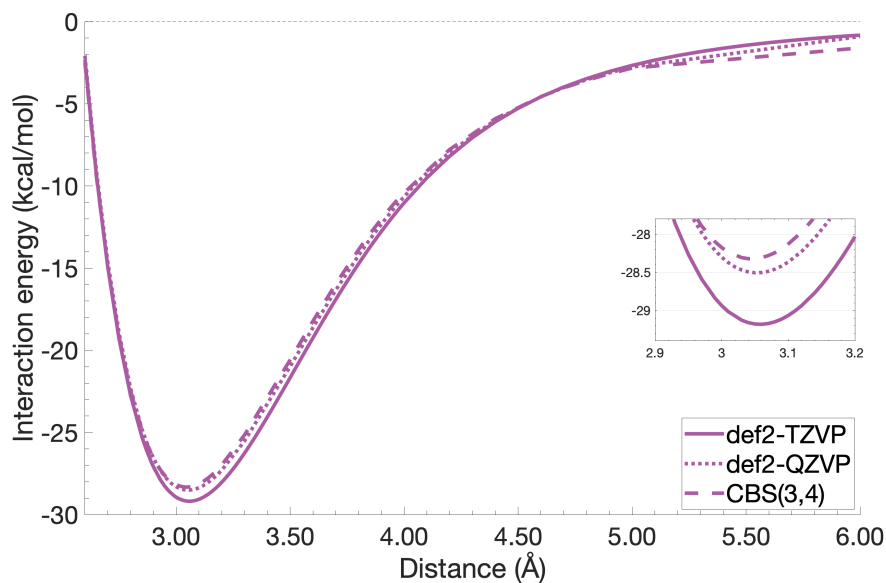

**Figure S3:** Dissociation curves for the lowest-lying excited state of the naphthalene excimer with spin-component scaled CC2 (SCS-CC2) across two successive basis sets in the Karlsruhe family (def2-nZVP) and their complete basis set extrapolated result, CBS(3,4). A magnified snapshot of the minima is shown to the right.

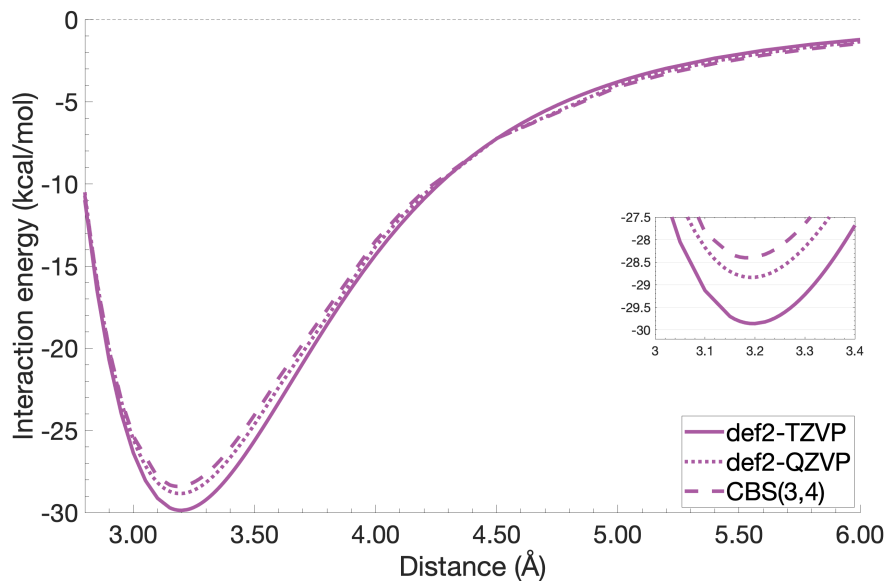

**Figure S4:** Dissociation curves for the lowest-lying excited state of the anthracene excimer with spin-component scaled CC2 (SCS-CC2) across two successive basis sets in the Karlsruhe family (def2-nZVP) and their complete basis set extrapolated result, CBS(3,4). A magnified snapshot of the minima is shown to the right.

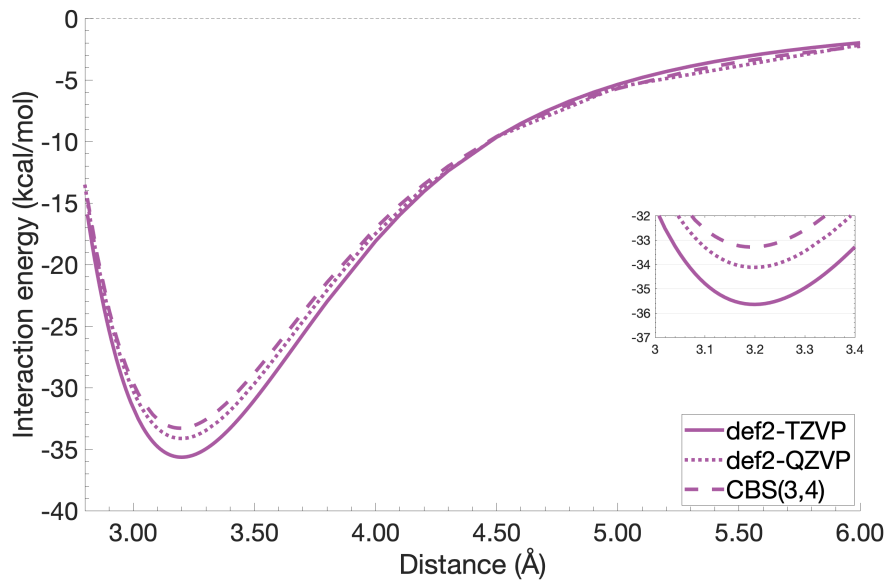

**Figure S5:** Dissociation curves for the lowest-lying excited state of the pyrene excimer with spin-component scaled CC2 (SCS-CC2) across two successive basis sets in the Karlsruhe family (def2-nZVP) and their complete basis set extrapolated result, CBS(3,4). A magnified snapshot of the minima is shown to the right.

## SI.3 The $\omega$ B97X Problem

There were some unanticipated technical problems for  $\omega$ B97X resulting in wobbly interaction energy curves as shown in the figures below.

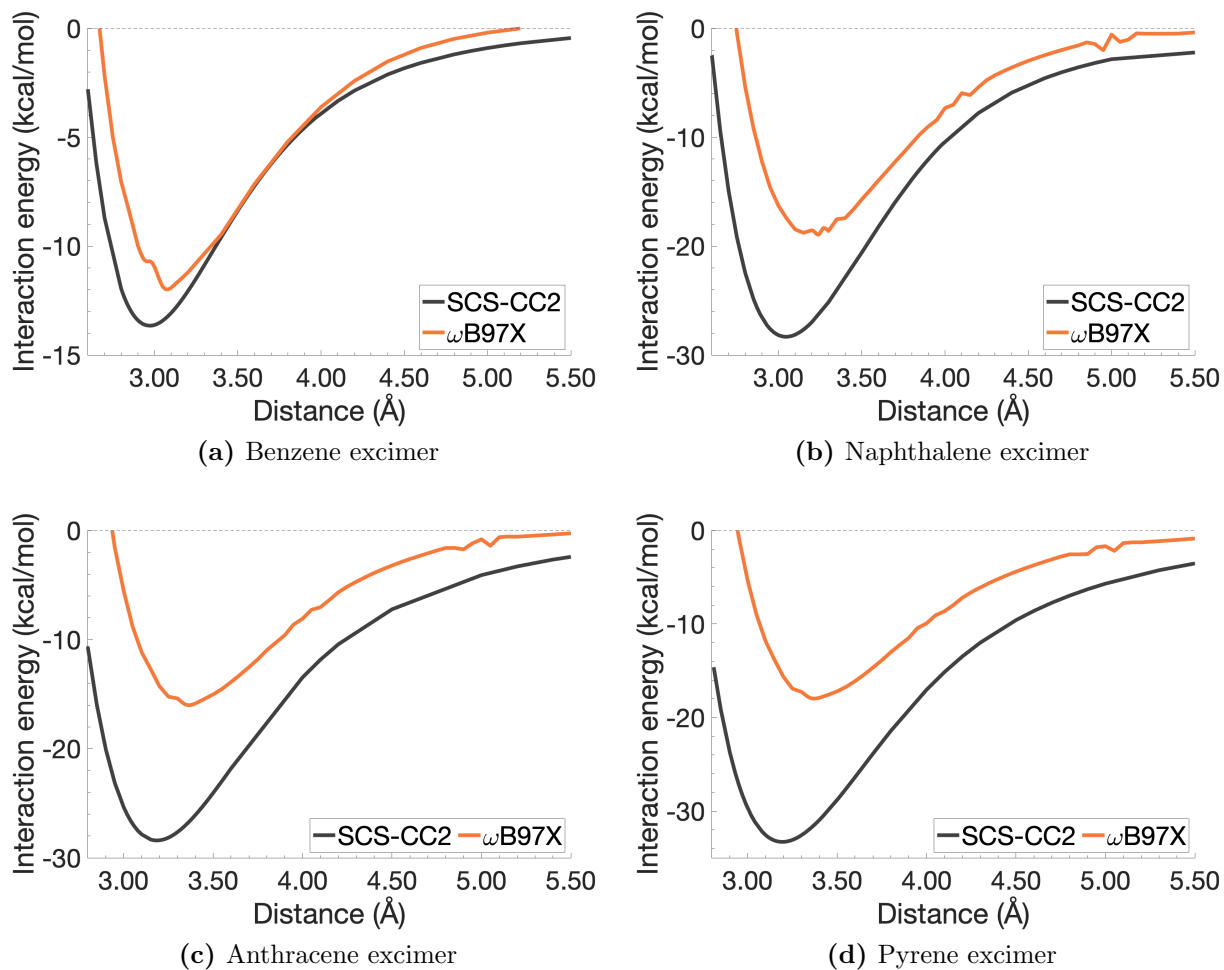

**Figure S6:** Dissociation energy curves for  $\omega$ B97X and SCS-CC2/CBS(3,4) for each excimer. Due to the difficulty of identifying the actual minima for  $\omega$ B97X we defined each  $D_e$  from the mathematical minimum of each curve.

# SI.4 Additional Data For Benchmarking TD-DFT methods

## SI.4.1 Fock Exchange Study

### SI.4.1.1 Tables of Minima and Signed Percentage Errors

**Table S3:** Dissociation energies ( $D_e$ ; kcal/mol), equilibrium inter-monomer distances ( $r_e$ ; Å) and signed percentage errors relative to the SCS-CC2/CBS(3,4) reference for TD-BLYP and global hybrid variants with varied amounts of Fock exchange.

| Excimer           | Benzene            | Naphthalene | Anthracene | Pyrene | Benzene            | Naphthalene | Anthracene | Pyrene |
|-------------------|--------------------|-------------|------------|--------|--------------------|-------------|------------|--------|
| Fock exchange (%) | $D_e$ (kcal/mol)   |             |            |        | $r_e$ (Å)          |             |            |        |
| 0 <sup>a</sup>    | 10.56              | 0.73        | -          | -      | 3.23               | 3.57        | -          | -      |
| 20                | 10.68              | 14.69       | 9.19       | 10.60  | 3.15               | 3.37        | 3.61       | 3.67   |
| 37.5              | 8.72               | 12.61       | 7.41       | 9.08   | 3.14               | 3.32        | 3.54       | 3.59   |
| 50                | 8.10               | 11.79       | 6.88       | 8.22   | 3.13               | 3.29        | 3.51       | 3.54   |
| 75                | 7.57               | 10.60       | 6.40       | 7.14   | 3.12               | 3.26        | 3.47       | 3.51   |
| Fock exchange (%) | Error in $D_e$ (%) |             |            |        | Error in $r_e$ (%) |             |            |        |
| 0 <sup>a</sup>    | -22.7              | -97.4       | -          | -      | 8.8                | 17.4        | -          | -      |
| 20                | -21.7              | -48.1       | -67.7      | -68.2  | 6.1                | 10.9        | 13.5       | 15.0   |
| 37.5              | -36.1              | -55.5       | -73.9      | -72.7  | 5.7                | 9.2         | 11.3       | 12.5   |
| 50                | -40.7              | -58.4       | -75.8      | -75.3  | 5.4                | 8.2         | 10.4       | 11.0   |
| 75                | -44.6              | -62.6       | -77.5      | -78.6  | 5.1                | 7.2         | 9.1        | 10.0   |

<sup>a</sup>BLYP does not predict minima for the anthracene and pyrene excimer states. See Fig. S7.

**Table S4:** Dissociation energies ( $D_e$ ), equilibrium inter-monomer distances ( $r_e$ ) and signed percentage errors relative to the SCS-CC2/CBS(3,4) reference for TD-PBE and global hybrid variants with varied amounts of Fock exchange.

| Excimer           | Benzene            | Naphthalene | Anthracene | Pyrene | Benzene            | Naphthalene | Anthracene | Pyrene |
|-------------------|--------------------|-------------|------------|--------|--------------------|-------------|------------|--------|
| Fock exchange (%) | $D_e$ (kcal/mol)   |             |            |        | $r_e$ (Å)          |             |            |        |
| 0                 | 15.38              | 5.42        | 3.23       | 1.76   | 3.10               | 3.36        | 3.60       | 3.71   |
| 20                | 14.65              | 18.99       | 13.24      | 14.44  | 3.05               | 3.25        | 3.47       | 3.52   |
| 37.5              | 12.62              | 17.00       | 11.31      | 13.09  | 3.03               | 3.20        | 3.40       | 3.44   |
| 50                | 11.50              | 15.69       | 10.10      | 11.53  | 3.02               | 3.17        | 3.38       | 3.41   |
| 75                | 9.92               | 13.27       | 7.98       | 8.69   | 3.00               | 3.15        | 3.35       | 3.38   |
| Fock exchange (%) | Error in $D_e$ (%) |             |            |        | Error in $r_e$ (%) |             |            |        |
| 0                 | 12.6               | -80.9       | -88.6      | -94.7  | 4.4                | 10.5        | 13.2       | 16.3   |
| 20                | 7.3                | -33.0       | -53.4      | -56.6  | 2.7                | 6.9         | 9.1        | 10.3   |
| 37.5              | -7.6               | -40.0       | -60.2      | -60.7  | 2.0                | 5.3         | 6.9        | 7.8    |
| 50                | -15.7              | -44.6       | -64.4      | -65.4  | 1.7                | 4.3         | 6.3        | 6.9    |
| 75                | -27.3              | -53.2       | -71.9      | -73.9  | 1.0                | 3.6         | 5.3        | 6.0    |

### SI.4.1.2 Dissociation Curves

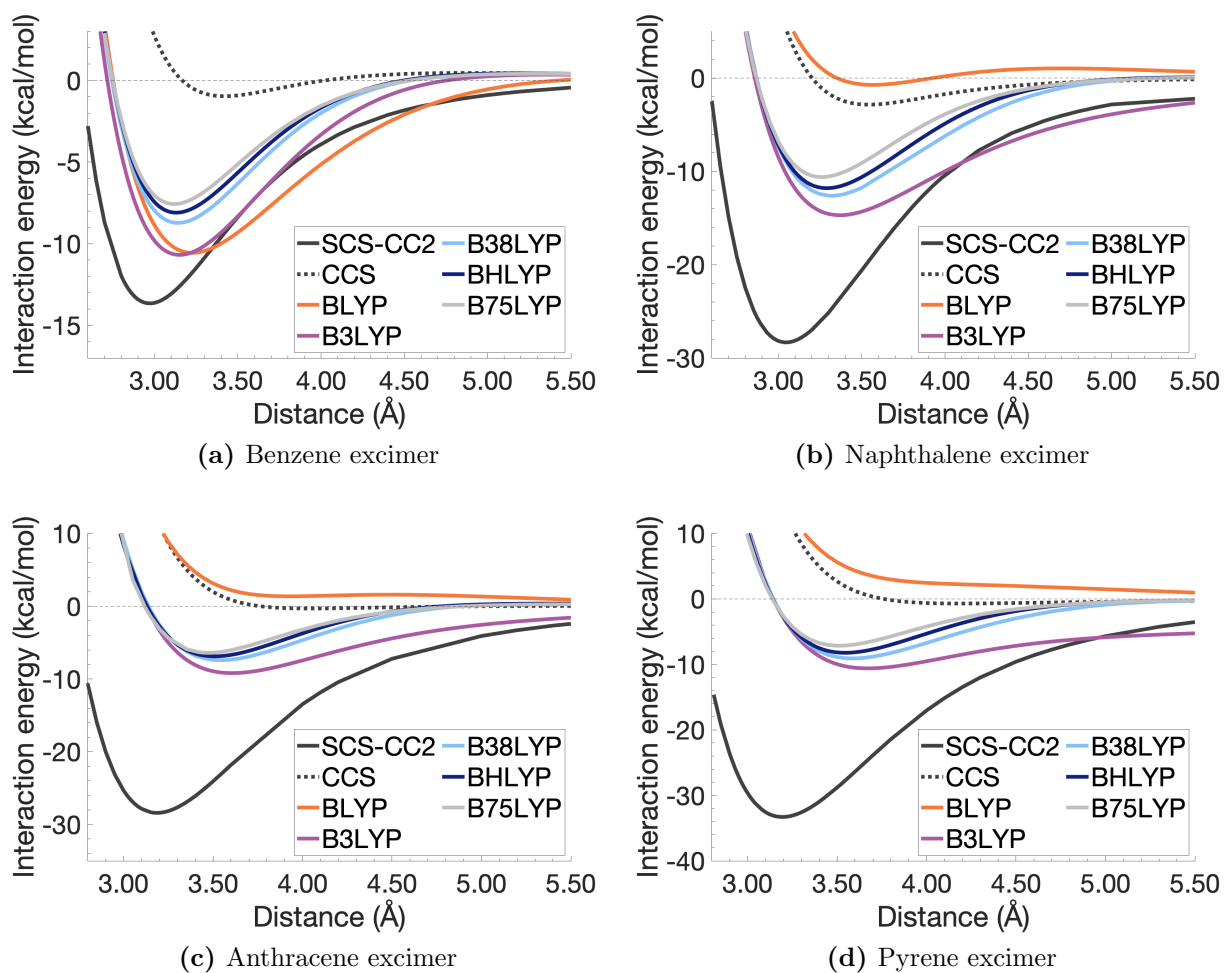

**Figure S7:** Dissociation energy curves for TD-BLYP and global hybrid variants with varied amounts of Fock exchange. SCS-CC2/CBS(3,4) and CCS/def2-TZVP curves are also shown for reference.



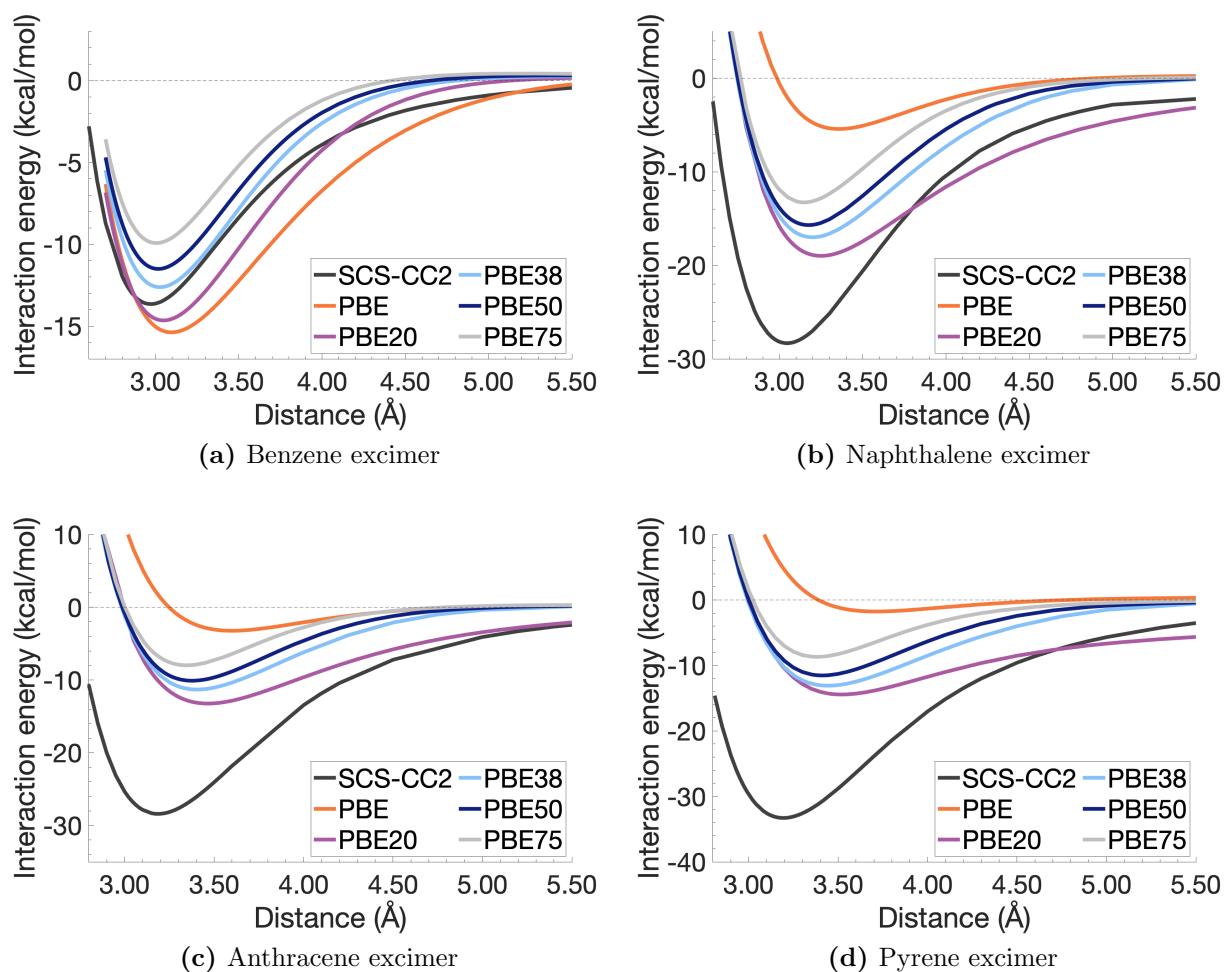

**Figure S8:** Dissociation energy curves for TD-PBE and global hybrid variants with varied amounts of Fock exchange. SCS-CC2/CBS(3,4) curves are also shown for reference.

## SI.4.2 DFT-D Corrected TD-DFT

### SI.4.2.1 Dissociation Curves

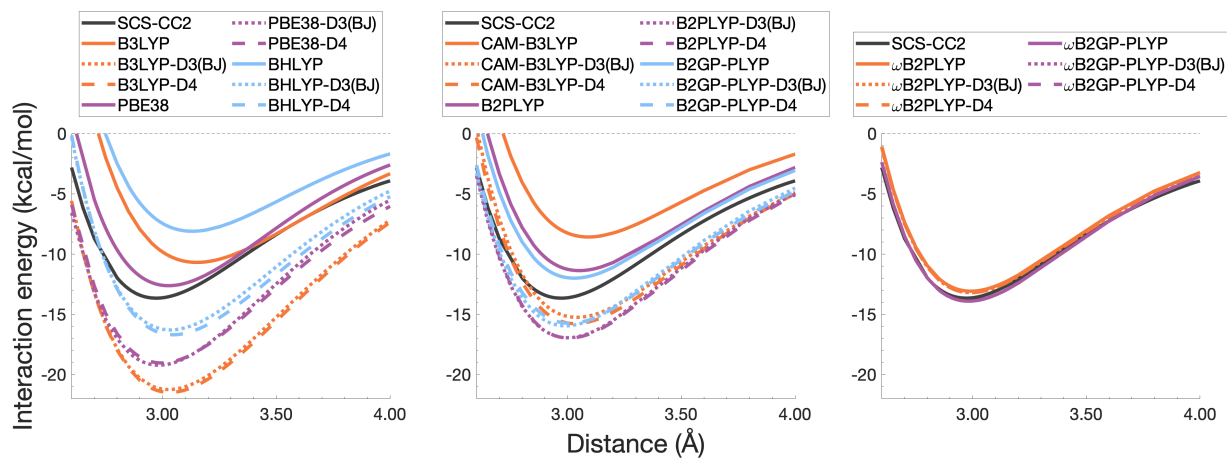

**Figure S9:** Dissociation energy curves for the benzene excimer comparing density functional approximations, with and without DFT-D type dispersion corrections, to the SCS-CC2/CBS(3,4) reference. All TD-DFT results are based on the def2-TZVP basis set.

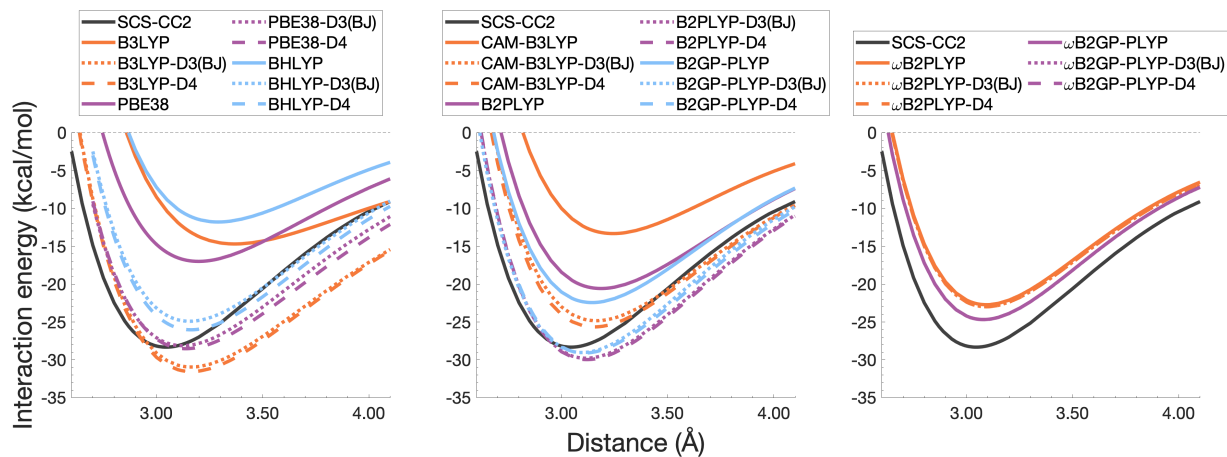

**Figure S10:** Dissociation energy curves for the naphthalene excimer comparing density functional approximations, with and without DFT-D type dispersion corrections, to the SCS-CC2/CBS(3,4) reference. All TD-DFT results are based on the def2-inter-monomerTZVP basis set.

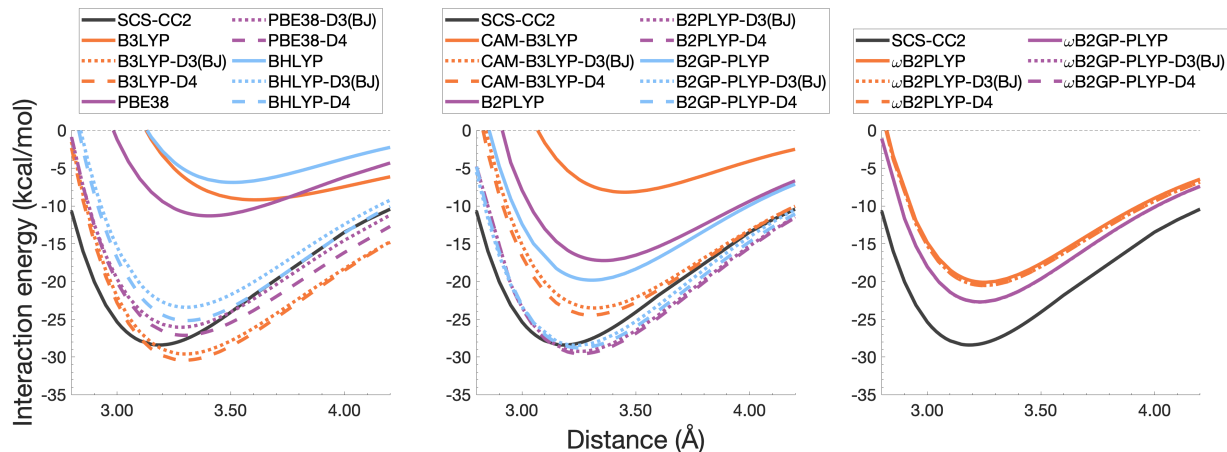

**Figure S11:** Dissociation energy curves for the anthracene excimer comparing density functional approximations, with and without DFT-D type dispersion corrections, to the SCS-CC2/CBS(3,4) reference.

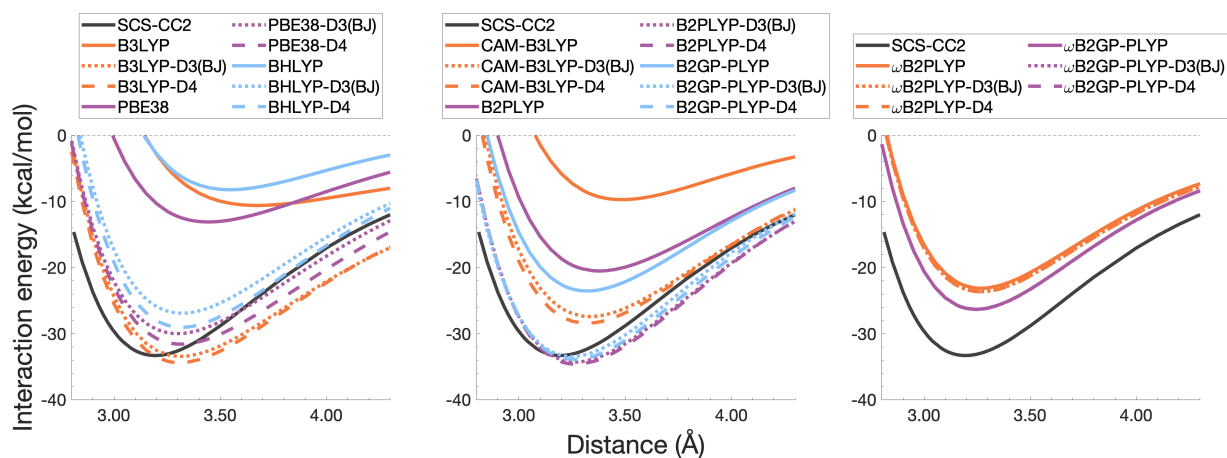

**Figure S12:** Dissociation energy curves for the pyrene excimer comparing density functional approximations, with and without DFT-D type dispersion corrections, to the SCS-CC2/CBS(3,4) reference.

### SI.4.2.2 Unphysical Positive Regions in Mid-range of Dissociation Curves

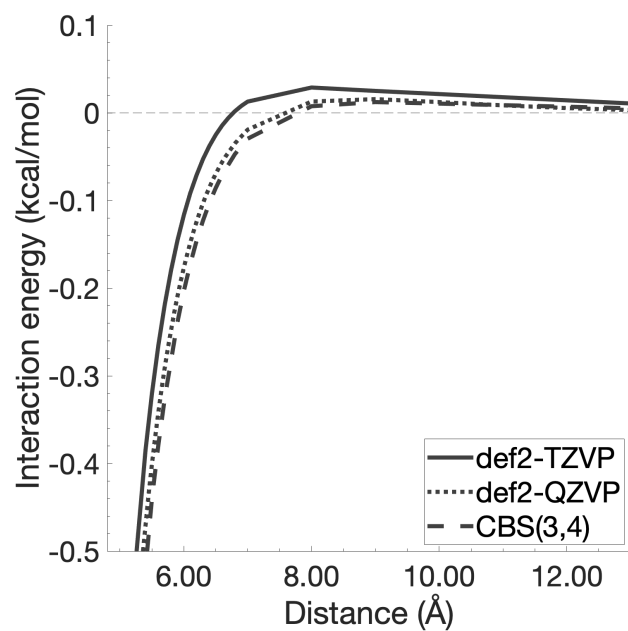

**Figure S13:** Mid-range region of SCS-CC2 dissociation curves for the benzene excimer with two truncated basis sets and their CBS(3,4) extrapolation.

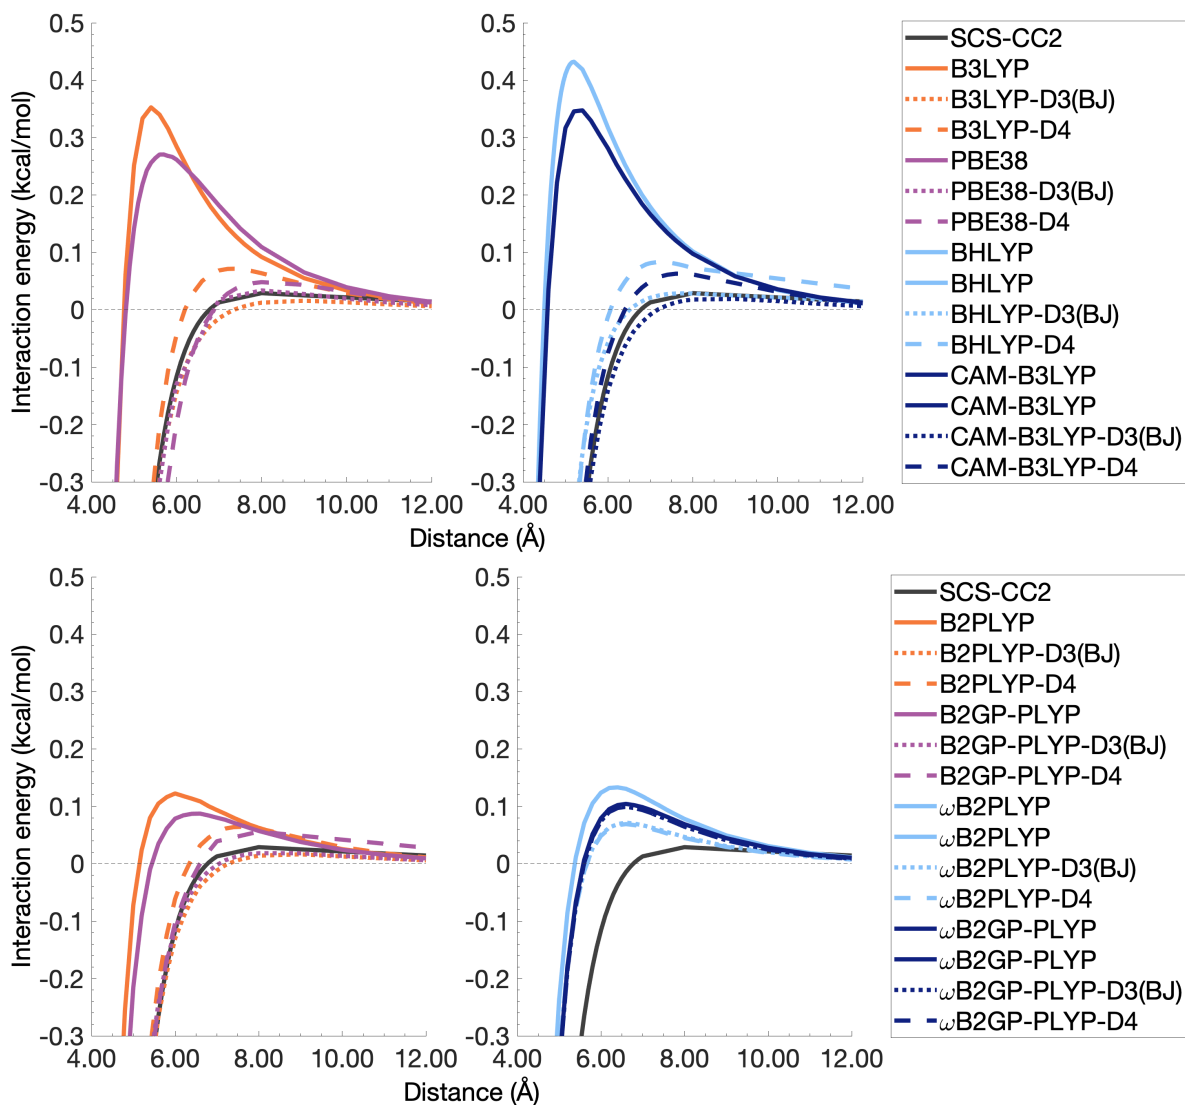

**Figure S14:** Mid-range region of the dissociation energy curves for the benzene excimer comparing density functional approximations, with and without DFT-D type dispersion corrections, to the SCS-CC2/CBS(3,4) reference.

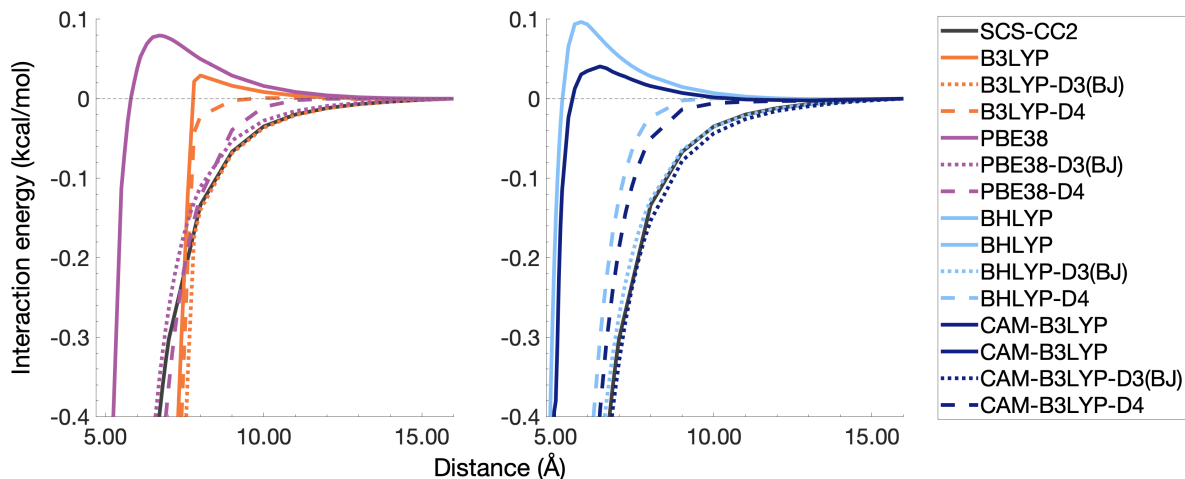

**Figure S15:** Mid-range region of the dissociation energy curves for the naphthalene excimer comparing density functional approximations, with and without DFT-D type dispersion corrections, to the SCS-CC2/def2-TZVP reference. All TD-DFT results are based on the def2-TZVP basis set. As distances beyond the binding region were not the focus of the paper, some curves may show strange shapes in the mid-range due to the small number of data points however they still showcase the identified positive region.

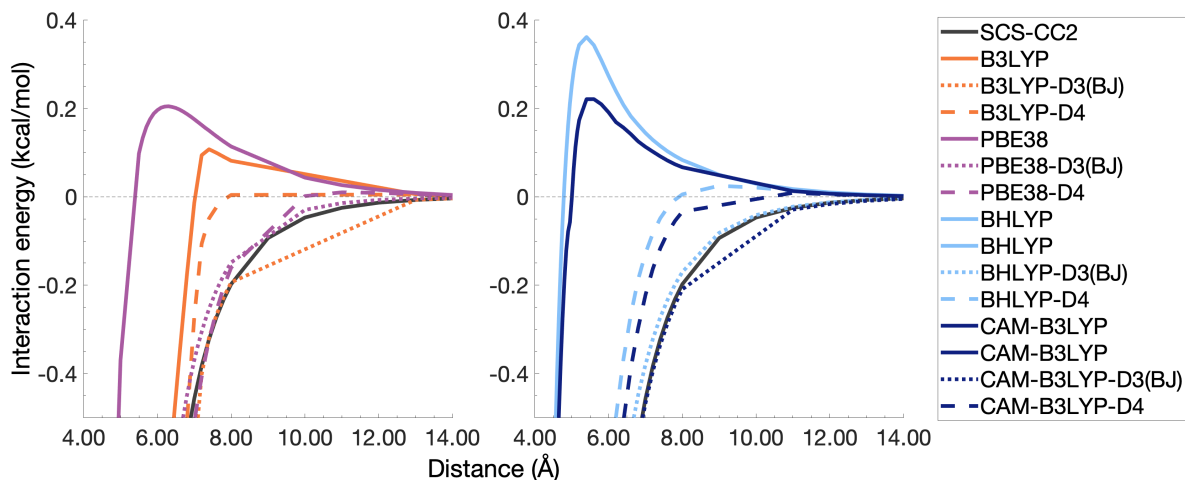

**Figure S16:** Mid-range region of the dissociation energy curves for the anthracene excimer comparing density functional approximations, with and without DFT-D type dispersion corrections, to the SCS-CC2/def2-TZVP reference. All TD-DFT results are based on the def2-TZVP basis set. As distances beyond the binding region were not the focus of the paper, some curves may show strange shapes in the mid-range due to the small number of data points however they still showcase the identified positive region.

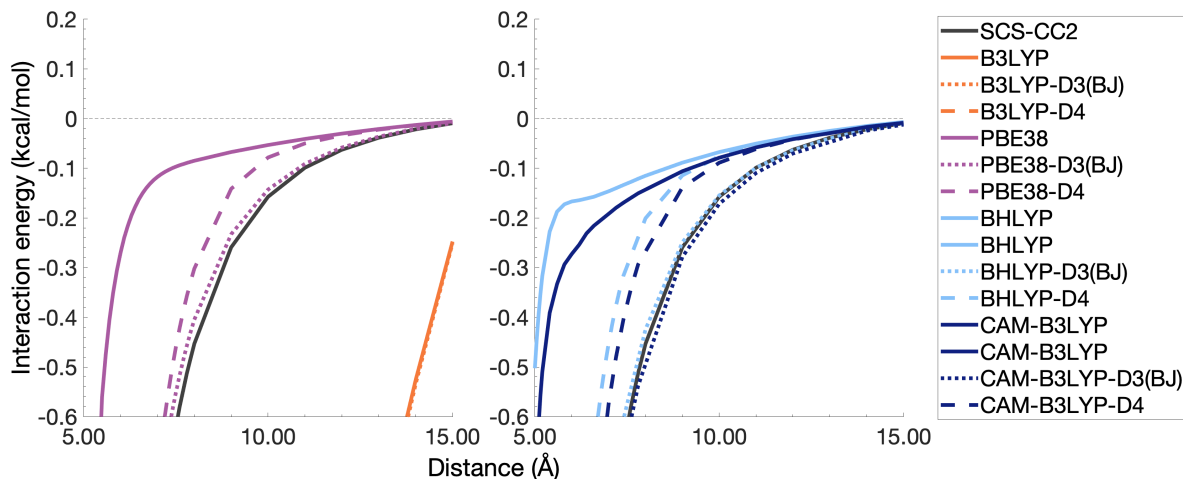

**Figure S17:** Mid-range region of the dissociation energy curves for the pyrene excimer comparing density functional approximations, with and without DFT-D type dispersion corrections, to the SCS-CC2/def2-TZVP reference. All TD-DFT results are based on the def2-TZVP basis set. As distances beyond the binding region were not the focus of the paper, some curves may show strange shapes in the mid-range due to the small number of data points however they still showcase the identified positive region.

### SI.4.3 Numerical Data For Binding Minima and Associated Percentage errors

**Table S5:** Binding of the benzene excimer described by the dissociation energy ( $D_e$ ; kcal/mol), equilibrium inter-monomer distance ( $r_e$ ; Å) and the unsigned percentage errors of each compared to that of the SCS-CC2/CBS(3,4) reference.

| Functional                 | $D_e$                     |        |       | $r_e$                     |        |      |
|----------------------------|---------------------------|--------|-------|---------------------------|--------|------|
|                            | Uncorrected               | D3(BJ) | D4    | Uncorrected               | D3(BJ) | D4   |
| B3LYP                      | 10.68                     | 21.24  | 21.47 | 3.15                      | 3.03   | 3.03 |
| PBE38                      | 12.62                     | 19.21  | 19.03 | 3.03                      | 2.98   | 3.00 |
| BHLYP                      | 8.10                      | 16.28  | 16.69 | 3.13                      | 3.03   | 3.05 |
| CAM-B3LYP                  | 8.58                      | 15.24  | 15.77 | 3.09                      | 3.04   | 3.03 |
| $\omega$ B97X <sup>a</sup> | 11.99                     | -      | -     | 3.08                      | -      | -    |
| B2PLYP                     | 11.36                     | 16.94  | 16.96 | 3.05                      | 3.00   | 3.01 |
| B2GP-PLYP                  | 11.99                     | 15.95  | 15.73 | 3.03                      | 2.99   | 3.01 |
| $\omega$ B2PLYP            | 13.07                     | 13.20  | 13.19 | 2.99                      | 2.99   | 2.99 |
| $\omega$ B2GP-PLYP         | 13.90                     | 13.90  | 13.90 | 2.98                      | 2.98   | 2.98 |
|                            | Percentage error in $D_e$ |        |       | Percentage error in $r_e$ |        |      |
| Functional                 | Uncorrected               | D3(BJ) | D4    | Uncorrected               | D3(BJ) | D4   |
| B3LYP                      | 21.7                      | 55.5   | 57.3  | 6.1                       | 2.0    | 2.0  |
| PBE38                      | 7.6                       | 40.7   | 39.4  | 2.0                       | 0.3    | 1.0  |
| BHLYP                      | 40.7                      | 19.3   | 22.2  | 5.4                       | 2.0    | 2.7  |
| CAM-B3LYP                  | 37.2                      | 11.7   | 15.5  | 4.0                       | 2.4    | 2.0  |
| $\omega$ B97X <sup>a</sup> | 12.2                      | -      | -     | 3.7                       | -      | -    |
| B2PLYP                     | 16.8                      | 24.1   | 24.3  | 2.7                       | 1.0    | 1.3  |
| B2GP-PLYP                  | 12.2                      | 16.8   | 15.7  | 2.0                       | 0.7    | 1.3  |
| $\omega$ B2PLYP            | 4.2                       | 3.3    | 3.4   | 0.7                       | 0.7    | 0.7  |
| $\omega$ B2GP-PLYP         | 1.8                       | 1.8    | 1.8   | 0.3                       | 0.3    | 0.3  |

<sup>a</sup>We assessed the pure  $\omega$ B97X. Its various dispersion-corrected variants all depend on slightly different underlying XC expressions,<sup>S1-S6</sup> which is why dispersion-corrected results are not provided.

**Table S6:** Binding of the naphthalene excimer described by the dissociation energy ( $D_e$ ; kcal/mol), equilibrium inter-monomer distance ( $r_e$ ; Å) and the unsigned percentage errors of each compared to that of the SCS-CC2/CBS(3,4) reference.

| Functional                 | $D_e$       |        |       | $r_e$       |        |      |
|----------------------------|-------------|--------|-------|-------------|--------|------|
|                            | Uncorrected | D3(BJ) | D4    | Uncorrected | D3(BJ) | D4   |
| B3LYP                      | 14.69       | 30.94  | 31.54 | 3.37        | 3.16   | 3.16 |
| PBE38                      | 17.00       | 28.13  | 28.52 | 3.20        | 3.12   | 3.14 |
| BHLYP                      | 11.79       | 24.90  | 26.03 | 3.29        | 3.16   | 3.16 |
| CAM-B3LYP                  | 13.32       | 24.83  | 25.65 | 3.24        | 3.16   | 3.15 |
| $\omega$ B97X <sup>a</sup> | 18.95       | -      | -     | 3.24        | -      | -    |
| B2PLYP                     | 20.58       | 29.78  | 29.96 | 3.19        | 3.11   | 3.12 |
| B2GP-PLYP                  | 22.43       | 29.03  | 29.09 | 3.14        | 3.10   | 3.11 |
| $\omega$ B2PLYP            | 22.72       | 22.98  | 22.99 | 3.09        | 3.09   | 3.09 |
| $\omega$ B2GP-PLYP         | 24.67       | 24.68  | 24.68 | 3.07        | 3.07   | 3.07 |

  

| Functional                 | Percentage error in $D_e$ |        |      | Percentage error in $r_e$ |        |     |
|----------------------------|---------------------------|--------|------|---------------------------|--------|-----|
|                            | Uncorrected               | D3(BJ) | D4   | Uncorrected               | D3(BJ) | D4  |
| B3LYP                      | 48.1                      | 9.3    | 11.4 | 10.9                      | 3.9    | 3.9 |
| PBE38                      | 40.0                      | 0.7    | 0.7  | 5.3                       | 2.6    | 3.3 |
| BHLYP                      | 58.4                      | 12.1   | 8.1  | 8.2                       | 3.9    | 3.9 |
| CAM-B3LYP                  | 53.0                      | 12.3   | 9.4  | 6.6                       | 3.9    | 3.6 |
| $\omega$ B97X <sup>a</sup> | 33.1                      | -      | -    | 6.6                       | -      | -   |
| B2PLYP                     | 27.3                      | 5.2    | 5.8  | 4.9                       | 2.3    | 2.6 |
| B2GP-PLYP                  | 20.8                      | 2.5    | 2.7  | 3.3                       | 2.0    | 2.3 |
| $\omega$ B2PLYP            | 19.8                      | 18.8   | 18.8 | 1.6                       | 1.6    | 1.6 |
| $\omega$ B2GP-PLYP         | 12.9                      | 12.9   | 12.9 | 1.0                       | 1.0    | 1.0 |

<sup>a</sup>We assessed the pure  $\omega$ B97X. Its various dispersion-corrected variants all depend on slightly different underlying XC expressions,<sup>S1-S6</sup> which is why dispersion-corrected results are not provided.

**Table S7:** Binding of the anthracene excimer described by the dissociation energy ( $D_e$ ; kcal/mol), equilibrium inter-monomer distance ( $r_e$ ; Å) and the unsigned percentage errors of each compared to that of the SCS-CC2/CBS(3,4) reference.

| Functional                 | $D_e$       |        |       | $r_e$       |        |      |
|----------------------------|-------------|--------|-------|-------------|--------|------|
|                            | Uncorrected | D3(BJ) | D4    | Uncorrected | D3(BJ) | D4   |
| B3LYP                      | 9.19        | 29.59  | 30.41 | 3.61        | 3.30   | 3.30 |
| PBE38                      | 11.31       | 26.05  | 27.12 | 3.40        | 3.28   | 3.30 |
| BHLYP                      | 6.88        | 23.40  | 25.17 | 3.51        | 3.31   | 3.31 |
| CAM-B3LYP                  | 8.18        | 23.50  | 24.44 | 3.45        | 3.32   | 3.30 |
| $\omega$ B97X <sup>a</sup> | 16.01       | -      | -     | 3.36        | -      | -    |
| B2PLYP                     | 17.23       | 29.24  | 29.55 | 3.36        | 3.25   | 3.26 |
| B2GP-PLYP                  | 19.82       | 28.44  | 28.78 | 3.31        | 3.24   | 3.25 |
| $\omega$ B2PLYP            | 20.10       | 20.53  | 20.54 | 3.25        | 3.25   | 3.25 |
| $\omega$ B2GP-PLYP         | 22.70       | 22.72  | 22.72 | 3.23        | 3.23   | 3.23 |

  

| Functional                 | Percentage error in $D_e$ |        |      | Percentage error in $r_e$ |        |      |
|----------------------------|---------------------------|--------|------|---------------------------|--------|------|
|                            | Uncorrected               | D3(BJ) | D4   | Uncorrected               | D3(BJ) | D4   |
| B3LYP                      | 67.7                      | 4.2    | 7.1  | 13.5                      | 3.8    | 3.8  |
| PBE38                      | 60.2                      | 8.3    | 4.5  | 6.9                       | 3.1    | 3.77 |
| BHLYP                      | 75.8                      | 17.6   | 11.4 | 10.4                      | 4.1    | 4.1  |
| CAM-B3LYP                  | 71.2                      | 17.2   | 14.0 | 8.5                       | 4.4    | 3.8  |
| $\omega$ B97X <sup>a</sup> | 43.6                      | -      | -    | 5.7                       | -      | -    |
| B2PLYP                     | 39.3                      | 3.0    | 4.1  | 5.7                       | 2.2    | 2.5  |
| B2GP-PLYP                  | 30.2                      | 0.1    | 1.3  | 4.1                       | 1.9    | 2.2  |
| $\omega$ B2PLYP            | 29.2                      | 27.7   | 27.7 | 2.2                       | 2.2    | 2.2  |
| $\omega$ B2GP-PLYP         | 20.1                      | 20.0   | 20.0 | 1.6                       | 1.6    | 1.6  |

<sup>a</sup>We assessed the pure  $\omega$ B97X. Its various dispersion-corrected variants all depend on slightly different underlying XC expressions,<sup>S1-S6</sup> which is why dispersion-corrected results are not provided.



**Table S8:** Binding of the pyrene excimer described by the dissociation energy ( $D_e$ ; kcal/mol), equilibrium inter-monomer distance ( $r_e$ ; Å) and the unsigned percentage errors of each compared to that of the SCS-CC2/CBS(3,4) reference.

| Functional                 | $D_e$       |        |       | $r_e$       |        |      |
|----------------------------|-------------|--------|-------|-------------|--------|------|
|                            | Uncorrected | D3(BJ) | D4    | Uncorrected | D3(BJ) | D4   |
| B3LYP                      | 10.60       | 33.41  | 34.37 | 3.67        | 3.31   | 3.31 |
| PBE38                      | 13.09       | 29.98  | 31.57 | 3.44        | 3.30   | 3.31 |
| BHLYP                      | 8.22        | 26.89  | 29.02 | 3.54        | 3.32   | 3.32 |
| CAM-B3LYP                  | 9.71        | 27.39  | 28.41 | 3.50        | 3.33   | 3.32 |
| $\omega$ B97X <sup>a</sup> | 17.97       | -      | -     | 3.37        | -      | -    |
| B2PLYP                     | 20.51       | 34.28  | 34.60 | 3.38        | 3.26   | 3.27 |
| B2GP-PLYP                  | 23.53       | 33.44  | 33.89 | 3.32        | 3.25   | 3.26 |
| $\omega$ B2PLYP            | 23.11       | 23.63  | 23.66 | 3.27        | 3.27   | 3.27 |
| $\omega$ B2GP-PLYP         | 26.29       | 26.32  | 26.32 | 3.25        | 3.25   | 3.25 |

  

| Functional         | Percentage error in $D_e$ |        |      | Percentage error in $r_e$ |        |     |
|--------------------|---------------------------|--------|------|---------------------------|--------|-----|
|                    | Uncorrected               | D3(BJ) | D4   | Uncorrected               | D3(BJ) | D4  |
| B3LYP              | 68.2                      | 0.4    | 3.2  | 15.0                      | 3.8    | 3.8 |
| PBE38              | 60.7                      | 9.9    | 5.2  | 7.8                       | 3.4    | 3.8 |
| BHLYP              | 75.3                      | 19.2   | 12.8 | 11.0                      | 4.1    | 4.1 |
| CAM-B3LYP          | 70.8                      | 17.7   | 14.7 | 9.7                       | 4.4    | 4.1 |
| $\omega$ B97x      | 46.0                      | -      | -    | 5.6                       | -      | -   |
| B2PLYP             | 38.4                      | 3.0    | 3.9  | 6.0                       | 2.2    | 2.5 |
| B2GP-PLYP          | 29.3                      | 0.5    | 1.8  | 4.1                       | 1.9    | 2.2 |
| $\omega$ B2PLYP    | 30.6                      | 29.0   | 28.9 | 2.5                       | 2.5    | 2.5 |
| $\omega$ B2GP-PLYP | 21.0                      | 20.9   | 20.9 | 1.9                       | 1.9    | 1.9 |

<sup>a</sup>We assessed the pure  $\omega$ B97X. Its various dispersion-corrected variants all depend on slightly different underlying XC expressions,<sup>S1-S6</sup> which is why dispersion-corrected results are not provided.

## SI.4.4 Mean Absolute Deviations

**Table S9:** Mean absolute deviations (MADs) for the dissociation energy ( $D_e$ ; kcal/mol) and equilibrium distance ( $r_e$ ; Å) characterising the description of excimer binding by the method relative to SCS-CC2/CBS(3,4) reference.

| Functional         | $D_e$ MADs  |            |        | $r_e$ MADs  |            |        |
|--------------------|-------------|------------|--------|-------------|------------|--------|
|                    | Uncorrected | DFT-D3(BJ) | DFT-D4 | Uncorrected | DFT-D3(BJ) | DFT-D4 |
| B3LYP              | 14.63       | 2.88       | 3.53   | 0.36        | 0.11       | 0.11   |
| PBE38              | 12.41       | 2.85       | 2.15   | 0.17        | 0.07       | 0.09   |
| BHLYP              | 17.17       | 4.36       | 3.21   | 0.27        | 0.11       | 0.12   |
| CAM-B3LYP          | 15.97       | 3.97       | 3.41   | 0.23        | 0.12       | 0.11   |
| $\omega$ B97x      | 9.69        | -          | -      | 0.17        | -          | -      |
| B2PLYP             | 8.50        | 1.64       | 1.85   | 0.15        | 0.06       | 0.07   |
| B2GP-PLYP          | 6.47        | 0.80       | 0.96   | 0.11        | 0.05       | 0.06   |
| $\omega$ B2PLYP    | 6.16        | 5.83       | 5.82   | 0.06        | 0.06       | 0.06   |
| $\omega$ B2GP-PLYP | 4.15        | 4.14       | 4.14   | 0.04        | 0.04       | 0.04   |

<sup>a</sup>We assessed the pure  $\omega$ B97X. Its various dispersion-corrected variants all depend on slightly different underlying XC expressions,<sup>S1-S6</sup> which is why dispersion-corrected results are not provided.

# References

- (S1) Chai, J.-D.; Head-Gordon, M. Systematic optimization of long-range corrected hybrid density functionals. *J. Chem. Phys.* **2008**, *128*, 084106.
- (S2) Chai, J.-D.; Head-Gordon, M. *Phys. Chem. Chem. Phys.* **2008**, *10*, 6615–6620.
- (S3) Lin, Y.-S.; Li, G.-D.; Mao, S.-P.; Chai, J.-D. Long-Range Corrected Hybrid Density Functionals with Improved Dispersion Corrections. *J. Chem. Theory Comput. Chem.* **2013**, *9*, 263–272.
- (S4) Mardirossian, N.; Head-Gordon, M.  $\omega$ B97X-V: A 10-parameter, range-separated hybrid, generalized gradient approximation density functional with nonlocal correlation, designed by a survival-of-the-fittest strategy. *Phys. Chem. Chem. Phys.* **2014**, *16*, 9904–9924.
- (S5) Najibi, A.; Goerigk, L. The Nonlocal Kernel in van der Waals Density Functionals as an Additive Correction: An Extensive Analysis with Special Emphasis on the B97M-V and  $\omega$ B97M-V Approaches. *J. Chem. Theory Comput.* **2018**, *14*, 5725–5738.
- (S6) Najibi, A.; Goerigk, L. DFT-D4 counterparts of leading meta-generalized-gradient approximation and hybrid density functionals for energetics and geometries. *J. Comput. Chem.* **2020**, *41*, 2562–2572.
